# Supplementary material for: Are Reproductive Traits Related to Pollen Limitation in Plants? A Case Study from a Central European Meadow
Source: MDPI journal article supplement (doi:10.3390/plants9050640), 2020-05-19
Supplement: s1 [file s1]

**Table S1.** Correlation matrix of selected traits.

|                     | Specialization | Clonality   | Dichogamy | Sugar Content | No. of Open Flowers | Self-Compatibility | Autonomous Selfing |
|---------------------|----------------|-------------|-----------|---------------|---------------------|--------------------|--------------------|
| Specialization      |                |             |           |               |                     |                    |                    |
| Clonality           | -0.29          |             |           |               |                     |                    |                    |
| Dichogamy           | <b>-0.47</b>   | <b>0.43</b> |           |               |                     |                    |                    |
| Sugar content       | <b>0.68</b>    | -0.36       | -0.40     |               |                     |                    |                    |
| No. of open flowers | 0.01           | 0.01        | -0.30     | -0.14         |                     |                    |                    |
| Self-compatibility  | 0.30           | -0.07       | -0.27     | 0.31          | -0.04               |                    |                    |
| Autonomous selfing  | -0.08          | -0.21       | -0.02     | -0.09         | -0.12               | <b>0.50</b>        |                    |
